# Supplementary material for: Correlation of Milestone Restricted Mean Survival Time Ratio With Overall Survival Hazard Ratio in Randomized Clinical Trials of Immune Checkpoint Inhibitors: A Systematic Review and Meta-analysis
Source: PubMed Central journal article supplement (PMC6503508; doi:10.1001/jamanetworkopen.2019.3433), 2019-05-03
Supplement: jamanetwopen-2-e193433-s001.pdf [file jamanetwopen-2-e193433-s001.pdf]

## Supplementary Online Content

Wang Z-X, Wu H-X, Xie L, et al. Correlation of milestone restricted mean survival time ratio with overall survival hazard ratio in randomized clinical trials of immune checkpoint inhibitors: a systematic review and meta-analysis. *JAMA Netw Open*. 2019;2(5):e193433. doi:10.1001/jamanetworkopen.2019.3433

**eMethods.** Search Strategy.

**eTable 1.** Detailed Regimen and Characteristics of Trials Included

**eTable 2.** Comparison of Reported Overall Survival Results With Those Calculated Based on Reconstructed Individual Patient Data

**eTable 3.** Comparison of Reported Progression-Free Survival Results With Those Calculated Based on Reconstructed Individual Patient Data

**eTable 4.** Sensitivity Analyses in Which A, Only Trials With Primary or Coprimary End Point of Overall Survival Were Included; B, Only PD-L1 or PD-L1 Ligand 1 Inhibitors Trials Were Included; C, Only Phase 3 Trials Were Included; D, Only NSCLC Trials Were Included; E, Only Melanoma Trials Were Included; F, Only Trials Other Than NSCLC and Melanoma Were Included; G, Only First-Line Trials Were Included; and H, Only Second-Line or Beyond Trials Were Included

**eFigure.** Kaplan-Meier Survival Estimates

**eReferences**

This supplementary material has been provided by the authors to give readers additional information about their work.

## **eMethods**

### **Search Strategy**

#### **A. Medline (PubMed)**

- #1 randomized controlled trial [pt]
- #2 controlled clinical trial [pt]
- #3 randomized [tiab]
- #4 placebo [tiab]
- #5 clinical trials as topic [mesh: noexp]
- #6 randomly [tiab]
- #7 trial [ti]
- #8 #1 OR #2 OR #3 OR #4 OR #5 OR #6 OR #7
- #9 animals [mh] NOT humans [mh]
- #10 #8 NOT #9
- #11 Nivolumab
- #12 Opdivo
- #13 BMS-936558
- #14 MDX1106
- #15 ONO-4538
- #16 BMS-936559
- #17 MDX1105
- #18 Pembrolizumab
- #19 Lambrolizumab
- #20 Keytruda
- #21 MK-3475
- #22 Atezolizumab
- #23 MPDL3280
- #24 MPDL3280A
- #25 RG7446
- #26 Tecentriq
- #27 Avelumab
- #28 MSB0010718C
- #29 Durvalumab
- #30 MEDI4736
- #31 cemiplimab
- #32 REGN2810
- #33 PD-1 inhibitor
- #34 Programmed death 1 inhibitor
- #35 Anti-PD-1
- #36 Anti-Programmed Cell Death 1
- #37 PD-L1 inhibitor
- #38 Programmed death ligand 1 inhibitor
- #39 Anti-PD-L1
- #40 Anti-Programmed Cell Death Ligand-1
- #41 Checkpoint Inhibitor

#42 Checkpoint blockade  
#43 Programmed Cell Death 1 Receptor [mesh]  
#44 CTLA4 protein, human  
#45 anti CTLA4  
#46 anti CTLA-4  
#47 cytotoxic T-lymphocyte-associated antigen 4  
#48 Cytotoxic T lymphocyte antigen 4  
#49 CTLA-4  
#50 Cytotoxic T-lymphocyte protein 4  
#51 anti-CTLA4 antibodies  
#52 Ipilimumab  
#53 MDX-010  
#54 MDX-101  
#55 BMS-734016  
#56 Yervoy  
#57 Antigens, CD/immunology\* [mesh]  
#58 CTLA-4 Antigen [mesh]  
#59 #11 or #12 or #13 or #14 or #15 or #16 or #17 or #18 or #19 or #20 or #21 or #22 or #23 or #24  
or #25 or #26 or #27 or #28 or #29 or #30 or #31 or #32 or #33 or #34 or #35 or #36 or #37 or  
#38 or #39 or #40 or #41 or #42 or #43 or #44 or #45 or #46 or #47 or #48 or #49 or #50 or #51  
or #52 or #53 or #54 or #55 or #56 or #57 or #58  
#60 #10 and #59

**B. Embase (Ovid)**

1 Nivolumab  
2 Opdivo  
3 BMS-936558  
4 MDX1106  
5 ONO-4538  
6 BMS-936559  
7 MDX 1105  
8 Pembrolizumab  
9 Lambrolizumab  
10 Keytruda  
11 MK-3475  
12 Atezolizumab  
13 MPDL3280  
14 MPDL3280A  
15 RG7446  
16 Tecentriq  
17 Avelumab  
18 MSB0010718C  
19 Durvalumab  
20 MEDI4736  
21 cemiplimab

22 REGN2810  
 23 PD-1 inhibitor  
 24 Programmed death 1 inhibitor  
 25 Anti-PD-1  
 26 Anti-Programmed Cell Death 1  
 27 PD-L1 inhibitor  
 28 Programmed death ligand 1 inhibitor  
 29 Anti-PD-L1  
 30 Anti-Programmed Cell Death Ligand-1  
 31 Checkpoint Inhibitor  
 32 Checkpoint blockade  
 33 Programmed Cell Death 1 Receptor  
 34 CTLA4 protein, human  
 35 anti CTLA4  
 36 anti CTLA-4  
 37 cytotoxic T-lymphocyte-associated antigen 4  
 38 Cytotoxic T lymphocyte antigen 4  
 39 CTLA-4  
 40 Cytotoxic T-lymphocyte protein 4  
 41 anti-CTLA4 antibodies  
 42 Antigens, CD4  
 43 MDX-010  
 44 MDX-101  
 45 BMS-734016  
 46 Yervoy  
 47 CTLA-4 Antigen  
 48 Ipilimumab  
 49 1 or 2 or 3 or 4 or 5 or 6 or 7 or 8 or 9 or 10 or 11 or 12 or 13 or 14 or 15 or 16 or 17 or 18 or 19 or  
 20 or 21 or 22 or 23 or 24 or 25 or 26 or 27 or 28 or 29 or 30 or 31 or 32 or 33 or 34 or 35 or 36 or  
 37 or 38 or 39 or 40 or 41 or 42 or 43 or 44 or 45 or 46 or 47 or 48  
 50 'crossover procedure':de OR 'double-blind procedure':de OR 'randomized controlled trial':de OR  
 'singleblind procedure':de OR (random\* OR factorial\* OR crossover\* OR cross NEXT/1 over\* OR  
 placebo\* OR doubl\* NEAR/1 blind\* OR singl\* NEAR/1 blind\* OR assign\* OR allocat\* OR  
 volunteer\*):de,ab,ti

51 49 and 50

### **C. Cochrane Central Register of Controlled Trials**

#1 Nivolumab  
 #2 Opdivo  
 #3 BMS-936558  
 #4 MDX1106  
 #5 ONO-4538  
 #6 BMS-936559  
 #7 MDX 1105  
 #8 Pembrolizumab

#9 Lambrolizumab  
#10 Keytruda  
#11 MK-3475  
#12 Atezolizumab  
#13 MPDL3280  
#14 MPDL3280A  
#15 RG7446  
#16 Tecentriq  
#17 Avelumab  
#18 MSB0010718C  
#19 Durvalumab  
#20 MEDI4736  
#21 cemiplimab  
#22 REGN2810  
#23 PD-1 inhibitor  
#24 Programmed death 1 inhibitor  
#25 Anti-PD-1  
#26 Anti-Programmed Cell Death 1  
#27 PD-L1 inhibitor  
#28 Programmed death ligand 1 inhibitor  
#29 Anti-PD-L1  
#30 Anti-Programmed Cell Death Ligand-1  
#31 Checkpoint Inhibitor  
#32 Checkpoint blockade  
#33 MeSH descriptor: [Programmed Cell Death 1 Receptor] explode all trees  
#34 CTLA4 protein, human  
#35 anti CTLA4  
#36 anti CTLA-4  
#37 cytotoxic T-lymphocyte-associated antigen 4  
#38 Cytotoxic T lymphocyte antigen 4  
#39 CTLA-4  
#40 Cytotoxic T-lymphocyte protein 4  
#41 anti-CTLA4 antibodies  
#42 Antigens, CD  
#43 MDX-010  
#44 MDX-101  
#45 BMS-734016  
#46 Yervoy  
#47 CTLA-4 Antigen  
#48 Ipilimumab.mp  
#49 MeSH descriptor: [Antigens, CD4] explode all trees  
#50 MeSH descriptor: [CTLA-4 Antigens] explode all trees  
#51 #1 or #2 or #3 or #4 or #5 or #6 or #7 or #8 or #9 or #10 or #11 or #12 or #13 or #14 or #15 or #16  
or #17 or #18 or #19 or #20 or #21 or #22 or #23 or #24 or #25 or #26 or #27 or #28 or #29 or #30

or #31 or #32 or #33 or #34 or #35 or #36 or #37 or #38 or #39 or #40 or #41 or #42 or #43 or #44  
or #45 or #46 or #47 or #48 or #49 or #50

**eTable 1. Detailed Regimen and Characteristics of Trials Included**

| Trial                              | Experimental arm                                                                          | Control arm                                                                | Immune target | Tumor stage                              | Age (years) <sup>a</sup> |            | <i>P</i> <sup>b</sup> for proportional hazards test |
|------------------------------------|-------------------------------------------------------------------------------------------|----------------------------------------------------------------------------|---------------|------------------------------------------|--------------------------|------------|-----------------------------------------------------|
|                                    |                                                                                           |                                                                            |               |                                          | Experimental             | Control    |                                                     |
| Robert et al, <sup>1</sup><br>2015 | Nivolumab 3mg/kg q2w                                                                      | Dacarbazine 1000mg/m <sup>2</sup> q3w                                      | PD-1          | unresectable stage III or IV             | 64 (18-86)               | 66 (26-87) | <b>0.006</b>                                        |
| Hodi et al, <sup>2</sup><br>2016   | (Nivolumab 1mg/kg q3w + Ipilimumab 10 mg/kg q3w) x 4 then Nivolumab 3mg/kg q2w            | (Placebo 1mg/kg q3w + Ipilimumab 10 mg/kg q3w) x 4 then Placebo 3mg/kg q2w | PD-1 + CTLA-4 | unresectable stage III or IV             | 64 (27-87)               | 67 (31-80) | 0.270                                               |
| Larkin et al, <sup>3</sup><br>2018 | Nivolumab 3mg/kg q2w                                                                      | Physician's choice chemotherapy                                            | PD-1          | unresectable stage IIIC or IV metastatic | 59 (23-88)               | 62 (29-85) | 0.116                                               |
| Robert et al, <sup>4</sup><br>2015 | A: Pembrolizumab 10mg/kg q2w<br>B: Pembrolizumab 10mg/kg q3w                              | Ipilimumab 3mg/kg q3w                                                      | PD-1          | unresectable stage III or IV             | 63 (22-89)               | 62 (18-88) | 0.404<br>0.153                                      |
| Hodi et al, <sup>5</sup><br>2010   | A: Ipilimumab 3mg/kg q3w + glycoprotein 100 q3w<br>B: Ipilimumab 3mg/kg q3w + placebo q3w | Glycoprotein 100 q3w                                                       | CTLA-4        | unresectable stage III or IV             | 55.6 (NA)<br>56.8 (NA)   | 57.4 (NA)  | 0.538<br>0.355                                      |
| Robert et al, <sup>6</sup><br>2011 | Ipilimumab 10mg/kg q3w × 4 and maintenance q12w + dacarbazine 850mg/m <sup>2</sup> q3w ×8 | Dacarbazine 850mg/m <sup>2</sup> q3w ×8                                    | CTLA-4        | unresectable stage III or IV             | 57.5 (NA)                | 56.4 (NA)  | 0.954                                               |
| Hodi et al, <sup>7</sup><br>2014   | Ipilimumab 10mg/kg q3w + sargramostim 250µg D1-14 q3w                                     | Ipilimumab 10mg/kg q3w                                                     | CTLA-4        | unresectable stage III or IV             | 61 (25-86)               | 64 (21-89) | 0.452                                               |
| Ribas et al, <sup>8</sup><br>2013  | Tremelimumab 15mg/kg q90d                                                                 | Physician's choice chemotherapy                                            | CTLA-4        | unresectable stage IIIC or IV            | 57 (22-90)               | 56 (22-90) | 0.561                                               |

|                                       |                                                                                                                                                                                                   |                                                                                         |        |                            |                          |              |                       |
|---------------------------------------|---------------------------------------------------------------------------------------------------------------------------------------------------------------------------------------------------|-----------------------------------------------------------------------------------------|--------|----------------------------|--------------------------|--------------|-----------------------|
| Fehrenbacher et al, <sup>9</sup> 2016 | Atezolizumab 1200mg q3w                                                                                                                                                                           | Docetaxel 75mg/m <sup>2</sup> q3w                                                       | PD-L1  | advanced or metastatic     | 62 (42-82)               | 62 (36-84)   | <b>0.099</b>          |
| Rittmeyer et al, <sup>10</sup> 2017   | Atezolizumab 1200mg q3w                                                                                                                                                                           | Docetaxel 75mg/m <sup>2</sup> q3w                                                       | PD-L1  | stage IIIB or IV           | 63 (33-82)               | 64 (34-85)   | 0.442                 |
| Borghaei et al, <sup>11</sup> 2015    | Nivolumab 3mg/kg q2w                                                                                                                                                                              | Docetaxel 75mg/m <sup>2</sup> q3w                                                       | PD-1   | stage IIIB/IV or recurrent | 61 (37-84)               | 64 (21-85)   | <b>0.002</b>          |
| Brahmer et al, <sup>12</sup> 2015     | Nivolumab 3 mg/kg q2w                                                                                                                                                                             | Docetaxel 75mg/m <sup>2</sup> q3w                                                       | PD-1   | stage IIIB/IV              | 62 (39-85)               | 64 (42-84)   | 0.439                 |
| Carbone et al, <sup>13</sup> 2017     | Nivolumab 3mg/kg q2w                                                                                                                                                                              | Physician's choice chemotherapy                                                         | PD-1   | stage IV or recurrent      | 63 (33-89)               | 65 (29-87)   | 0.479                 |
| Herbst et al, <sup>14</sup> 2016      | A: Pembrolizumab 2mg/kg q3w<br>B: Pembrolizumab 10mg/kg q3w                                                                                                                                       | Docetaxel 75mg/m <sup>2</sup> q3w                                                       | PD-1   | advanced                   | 63 (56-69)<br>63 (56-69) | 62 (56-69)   | 0.318<br><b>0.066</b> |
| Langer et al, <sup>15</sup> 2016      | (Pembrolizumab 200mg + Pemetrexed 500mg/m <sup>2</sup> + Carboplatin AUC5) q3w x 4 + maintenance pembrolizumab up to 24 months +/- maintenance pemetrexed                                         | (Pemetrexed 500mg/m <sup>2</sup> + Carboplatin AUC5) q3w x 4 +/- maintenance pemetrexed | PD-1   | stage IIIB or IV           | 62.5 (54-70)             | 63.2 (58-70) | 0.608                 |
| Reck et al, <sup>16</sup> 2016        | Pembrolizumab 200mg q3w                                                                                                                                                                           | Physician's choice chemotherapy                                                         | PD-1   | stage IV                   | 64.5 (33-90)             | 66.0 (38-85) | 0.944                 |
| Lynch et al, <sup>17</sup> 2012       | A: Concurrent Ipilimumab 10 mg/kg q3w × 4 + carboplatin AUC6 + paclitaxel 175mg/m <sup>2</sup> ×6<br>B: Phased ipilimumab 10 mg/kg q3w ×4 + carboplatin AUC6 + paclitaxel 175mg/m <sup>2</sup> ×6 | Carboplatin AUC6 + paclitaxel 175 mg/m <sup>2</sup>                                     | CTLA-4 | stage IIIB/IV or recurrent | 61 (36-88)<br>59 (36-82) | 62 (36-82)   | 0.766<br>0.111        |



|                                       |                                                                                                                                                                                                                                                        |                                                                                                            |        |                                          |                              |              |                           |
|---------------------------------------|--------------------------------------------------------------------------------------------------------------------------------------------------------------------------------------------------------------------------------------------------------|------------------------------------------------------------------------------------------------------------|--------|------------------------------------------|------------------------------|--------------|---------------------------|
| Kang et al, <sup>18</sup><br>2017     | Nivolumab 3mg/kg q2w                                                                                                                                                                                                                                   | Placebo                                                                                                    | PD-1   | unresectable<br>advanced or<br>recurrent | 62 (54-69)                   | 61 (53-68)   | 0.405                     |
| Ferris et al, <sup>19</sup><br>2016   | Nivolumab 3mg/kg q2w                                                                                                                                                                                                                                   | Physician's choice chemotherapy                                                                            | PD-1   | recurrent or<br>metastatic               | 59 (29-83)                   | 61 (28-78)   | <b>0.004</b>              |
| Kwon et al, <sup>20</sup><br>2014     | Radiotherapy 8Gy + ipilimumab<br>10mg/kg q3w                                                                                                                                                                                                           | Radiotherapy 8Gy + placebo<br>10mg/kg q3w                                                                  | CTLA-4 | advanced                                 | 69 (47-86)                   | 67.5 (45-86) | <b>&lt;0.001</b>          |
| Beer et al, <sup>21</sup><br>2017     | Ipilimumab 10mg/kg q3w x 4 +<br>maintenance 10mg/kg q12w                                                                                                                                                                                               | Placebo                                                                                                    | CTLA-4 | metastatic                               | 70 (44-91)                   | 69 (42-92)   | <b>0.089</b>              |
| Motzer et<br>al, <sup>22</sup> 2015   | Nivolumab 3mg/kg q2w                                                                                                                                                                                                                                   | Everolimus 10mg daily                                                                                      | PD-1   | advanced or<br>metastatic                | 62 (23-88)                   | 62 (18-86)   | 0.121                     |
| Reck et al, <sup>23</sup><br>2013     | A: Concurrent ipilimumab 10mg/kg<br>q3w × 6 and maintenance q12w +<br>carboplatin AUC6 + paclitaxel<br>175mg/m <sup>2</sup><br>B: Phased ipilimumab 10mg/kg q3w<br>× 6 and maintenance q12w +<br>carboplatin AUC6 + paclitaxel<br>175mg/m <sup>2</sup> | Carboplatin AUC6 + paclitaxel 175<br>mg/m <sup>2</sup>                                                     | CTLA-4 | extensive-<br>stage                      | 59 (43-80)<br><br>57 (44-80) | 58 (42-82)   | <b>0.076</b><br><br>0.811 |
| Reck et al, <sup>24</sup><br>2016     | Ipilimumab 10mg/kg q3w + cisplatin<br>75mg/m <sup>2</sup> or carboplatin AUC5 D1 +<br>etoposide 100mg/m <sup>2</sup> D1-3                                                                                                                              | Placebo + cisplatin 75mg/m <sup>2</sup> or<br>carboplatin AUC5 D1 + etoposide<br>100mg/m <sup>2</sup> D1-3 | CTLA-4 | extensive-<br>stage                      | 62 (39-85)                   | 63 (36-81)   | 0.248                     |
| Powels et<br>al, <sup>25</sup> 2018   | Atezolizumab 1200mg q3w                                                                                                                                                                                                                                | Physician's choice chemotherapy                                                                            | PD-L1  | metastatic                               | 67 (43-88)                   | 67 (36-84)   | <b>0.014</b>              |
| Bellmunt et<br>al, <sup>26</sup> 2017 | Pembrolizumab 200mg q3w                                                                                                                                                                                                                                | Physician's choice chemotherapy                                                                            | PD-1   | advanced                                 | 67 (29-88)                   | 65 (26-84)   | <b>0.036</b>              |

Abbreviation: mg/kg, milligram per kilogram; mg/m<sup>2</sup>, milligram per square metre; q2w, once every 2 weeks; q3w, once every 3 weeks; q12w, once every 12 weeks; q90d, once every 90 days; AUC, area under the curve.

- a. Median (range)
- b. *P* value in bold denotes significant violation of proportional hazard assumption.

**eTable 2. Comparison of Reported Overall Survival Results With Those Calculated Based on Reconstructed Individual Patient Data.**

| Trial                                         | HR       |            |                     |                     | Median OS in the treatment group (months) |            |                     |                     | Median OS in the control group (months) |            |                     |                     |
|-----------------------------------------------|----------|------------|---------------------|---------------------|-------------------------------------------|------------|---------------------|---------------------|-----------------------------------------|------------|---------------------|---------------------|
|                                               | Reported | Calculated | Absolute Difference | Relative Difference | Reported                                  | Calculated | Absolute Difference | Relative Difference | Reported                                | Calculated | Absolute Difference | Relative Difference |
| Robert et al, <sup>1</sup> 2015               | 0.42     | 0.40       | -0.02               | -4.3%               | NR                                        | NR         | NA                  | NA                  | 10.8                                    | 10.9       | 0.1                 | 0.9%                |
| Hodi et al, <sup>2</sup> 2016                 | 0.74     | 0.74       | 0.00                | -0.5%               | NR                                        | NR         | NA                  | NA                  | NR                                      | NR         | NA                  | NA                  |
| Larkin et al, <sup>3</sup> 2018               | 0.95     | 0.92       | -0.03               | -3.0%               | 15.7                                      | 15.8       | 0.1                 | 0.6%                | 14.4                                    | 14.5       | 0.1                 | 0.7%                |
| Robert et al, <sup>4</sup> 2015 <sup>a</sup>  | 0.69     | 0.66       | -0.03               | -4.1%               | NR                                        | NR         | NA                  | NA                  | NR                                      | NR         | NA                  | NA                  |
| Robert et al, <sup>4</sup> 2015 <sup>b</sup>  | 0.63     | 0.63       | 0.00                | 0%                  | NR                                        | NR         | NA                  | NA                  | NR                                      | NR         | NA                  | NA                  |
| Hodi et al, <sup>5</sup> 2010 <sup>c</sup>    | 0.68     | 0.71       | 0.03                | 3.8%                | 10                                        | 10.14      | 0.14                | 1.4%                | 6.4                                     | 6.47       | 0.07                | 1.1%                |
| Hodi et al, <sup>5</sup> 2010 <sup>d</sup>    | 0.66     | 0.64       | -0.02               | -2.5%               | 10.1                                      | 10.2       | 0.1                 | 1.0%                | 6.4                                     | 6.47       | 0.07                | 1.1%                |
| Robert et al, <sup>6</sup> 2011               | 0.72     | 0.76       | 0.04                | 5.9%                | 11.2                                      | 11.26      | 0.06                | 0.5%                | 9.1                                     | 9.13       | 0.03                | 0.3%                |
| Hodi et al, <sup>7</sup> 2014                 | 0.64     | 0.67       | 0.03                | 4.2%                | 17.5                                      | 17.7       | 0.2                 | 1.1%                | 12.7                                    | 12.5       | -0.2                | -1.6%               |
| Ribas et al, <sup>8</sup> 2013                | 0.88     | 0.87       | -0.01               | -1.2%               | 12.6                                      | 12.6       | 0                   | 0.0%                | 10.7                                    | 10.8       | 0.1                 | 0.9%                |
| Fehrenbacher et al, <sup>9</sup> 2016         | 0.73     | 0.73       | 0.00                | 0.5%                | 12.6                                      | 12.5       | -0.1                | -0.8%               | 9.7                                     | 9.85       | 0.15                | 1.5%                |
| Rittmeyer et al, <sup>10</sup> 2017           | 0.73     | 0.74       | 0.01                | 0.9%                | 13.8                                      | 13.71      | -0.09               | -0.7%               | 9.6                                     | 9.64       | 0.04                | 0.4%                |
| Borghaei et al, <sup>11</sup> 2015            | 0.73     | 0.76       | 0.03                | 4.4%                | 12.2                                      | 12.27      | 0.07                | 0.6%                | 9.4                                     | 9.41       | 0.01                | 0.1%                |
| Brahmer et al, <sup>12</sup> 2015             | 0.59     | 0.59       | 0.00                | -0.2%               | 9.2                                       | 9.31       | 0.11                | 1.2%                | 6                                       | 6.07       | 0.07                | 1.2%                |
| Carbone et al, <sup>13</sup> 2017             | 1.02     | 1.05       | 0.03                | 2.6%                | 14.4                                      | 14.5       | 0.1                 | 0.7%                | 13.2                                    | 13.3       | 0.1                 | 0.8%                |
| Herbst et al, <sup>14</sup> 2016 <sup>e</sup> | 0.61     | 0.63       | 0.02                | 3.8%                | 12.7                                      | 12.64      | -0.06               | -0.5%               | 8.5                                     | 8.57       | 0.07                | 0.8%                |
| Herbst et al, <sup>14</sup> 2016 <sup>f</sup> | 0.71     | 0.73       | 0.02                | 3.1%                | 10.4                                      | 10.45      | 0.05                | 0.5%                | 8.5                                     | 8.57       | 0.07                | 0.8%                |
| Langer et al, <sup>15</sup> 2016              | 0.9      | 0.94       | 0.04                | 4.6%                | NR                                        | NR         | NA                  | NA                  | NR                                      | NR         | NA                  | NA                  |
| Reck et al, <sup>16</sup> 2016                | 0.6      | 0.61       | 0.01                | 2.5%                | NR                                        | NR         | NA                  | NA                  | NR                                      | NR         | NA                  | NA                  |
| Lynch et al, <sup>17</sup> 2012 <sup>g</sup>  | 0.87     | 0.86       | -0.01               | -1.2%               | 12.2                                      | 12.19      | -0.01               | -0.1%               | 8.3                                     | 8.27       | -0.03               | -0.4%               |

|                                              |      |      |       |       |      |       |       |       |      |      |       |       |
|----------------------------------------------|------|------|-------|-------|------|-------|-------|-------|------|------|-------|-------|
| Lynch et al, <sup>17</sup> 2012 <sup>h</sup> | 0.99 | 0.99 | 0.00  | 0.1%  | 9.69 | 9.76  | 0.07  | 0.7%  | 8.28 | 8.27 | -0.01 | -0.1% |
| Kang et al, <sup>18</sup> 2017               | 0.63 | 0.64 | 0.01  | 2.3%  | 5.26 | 5.32  | 0.06  | 1.1%  | 4.14 | 4.21 | 0.07  | 1.7%  |
| Ferris et al, <sup>19</sup> 2016             | 0.7  | 0.71 | 0.01  | 1.3%  | 7.5  | 7.56  | 0.06  | 0.8%  | 5.1  | 5.1  | 0     | 0.0%  |
| Kwon et al, <sup>20</sup> 2014               | 0.85 | 0.85 | 0.00  | 0.1%  | 11.2 | 11.2  | 0     | 0.0%  | 10   | 10.1 | 0.1   | 1.0%  |
| Beer et al, <sup>21</sup> 2017               | 1.11 | 1.07 | -0.04 | -3.8% | 28.7 | 28.4  | -0.3  | -1.0% | 29.7 | 29.6 | -0.1  | -0.3% |
| Motzer et al, <sup>22</sup> 2015             | 0.73 | 0.76 | 0.03  | 3.5%  | 25   | 24.9  | -0.1  | -0.4% | 19.6 | 19.5 | -0.1  | -0.5% |
| Reck et al, <sup>23</sup> 2013 <sup>i</sup>  | 0.75 | 0.77 | 0.02  | 2.6%  | 12.9 | 13.01 | 0.11  | 0.9%  | 9.9  | 9.93 | 0.03  | 0.3%  |
| Reck et al, <sup>23</sup> 2013 <sup>j</sup>  | 0.95 | 0.95 | 0.00  | -0.3% | 9.13 | 9.12  | -0.01 | -0.1% | 9.92 | 9.93 | 0.01  | 0.1%  |
| Reck et al, <sup>24</sup> 2016               | 0.94 | 0.93 | -0.01 | -0.7% | 11   | 11.1  | 0.1   | 0.9%  | 10.9 | 10.8 | -0.1  | -0.9% |
| Powels et al, <sup>25</sup> 2018             | 0.87 | 0.83 | -0.04 | -4.8% | 11.1 | 11.1  | 0     | 0.0%  | 10.6 | 10.8 | 0.2   | 1.9%  |
| Bellmunt et al, <sup>26</sup> 2017           | 0.73 | 0.73 | 0.00  | -0.5% | 10.3 | 10.49 | 0.19  | 1.8%  | 7.4  | 7.35 | -0.05 | -0.7% |

Abbreviations: OS, overall survival; HR, hazard ratio; NR, not reached; NA, not available.

- a. Pembrolizumab q3w vs. ipilimumab.
- b. Pembrolizumab q2w vs. ipilimumab.
- c. Ipilimumab + glycoprotein 100 vs. glycoprotein 100.
- d. Ipilimumab vs. glycoprotein 100.
- e. Pembrolizumab 10mg/kg vs. Docetaxel.
- f. Pembrolizumab 2mg/kg vs. Docetaxel.
- g. Phased ipilimumab + carboplatin + paclitaxel vs. carboplatin + paclitaxel.
- h. Concurrent ipilimumab + carboplatin + paclitaxel vs. carboplatin + paclitaxel.
- i. Phased ipilimumab + carboplatin + paclitaxel vs. carboplatin + paclitaxel.
- j. Concurrent ipilimumab + carboplatin + paclitaxel vs. carboplatin + paclitaxel.

**eTable 3. Comparison of Reported Progression-Free Survival Results With Those Calculated Based on Reconstructed Individual Patient Data**

| Trial                                         | HR       |            |                     |                     | Median PFS in the treatment group (months) |            |                     |                     | Median PFS in the control group (months) |            |                     |                     |
|-----------------------------------------------|----------|------------|---------------------|---------------------|--------------------------------------------|------------|---------------------|---------------------|------------------------------------------|------------|---------------------|---------------------|
|                                               | Reported | Calculated | Absolute Difference | Relative Difference | Reported                                   | Calculated | Absolute Difference | Relative Difference | Reported                                 | Calculated | Absolute Difference | Relative Difference |
| Robert et al, <sup>1</sup> 2015               | 0.43     | 0.47       | 0.04                | 9.0%                | 5.1                                        | 5.21       | 0.11                | 2.2%                | 2.2                                      | 2.21       | 0.01                | 0.5%                |
| Hodi et al, <sup>2</sup> 2016                 | 0.36     | 0.37       | 0.01                | 2.1%                | NR                                         | NA         | NA                  | NA                  | 3                                        | 3.17       | 0.17                | 5.7%                |
| Larkin et al, <sup>3</sup> 2018               | 1.03     | 1.00       | -0.03               | -3.1%               | 3.1                                        | 3          | -0.1                | -3.2%               | 3.7                                      | 3.79       | 0.09                | 2.4%                |
| Robert et al, <sup>4</sup> 2015 <sup>a</sup>  | 0.58     | 0.59       | 0.01                | 1.4%                | 4.1                                        | 4.11       | 0.01                | 0.2%                | 2.8                                      | 2.82       | 0.02                | 0.7%                |
| Robert et al, <sup>4</sup> 2015 <sup>b</sup>  | 0.58     | 0.62       | 0.04                | 6.3%                | 5.5                                        | 5.7        | 0.2                 | 3.6%                | 2.8                                      | 2.82       | 0.02                | 0.7%                |
| Hodi et al <sup>5</sup> , 2010 <sup>c</sup>   | 0.81     | 0.82       | 0.01                | 1.7%                | 2.76                                       | 2.78       | 0.02                | 0.7%                | 2.76                                     | 2.76       | 0                   | 0.0%                |
| Hodi et al, <sup>5</sup> 2010 <sup>d</sup>    | 0.64     | 0.69       | 0.05                | 7.2%                | 2.86                                       | 2.81       | -0.05               | -1.7%               | 2.76                                     | 2.76       | 0                   | 0.0%                |
| Robert et al, <sup>6</sup> 2011               | 0.76     | 0.78       | 0.02                | 2.5%                | NA                                         | 2.76       | NA                  | NA                  | NA                                       | 2.6        | NA                  | NA                  |
| Hodi et al, <sup>7</sup> 2014                 | 0.87     | 0.92       | 0.05                | 5.8%                | 3.1                                        | 3.08       | -0.02               | -0.6%               | 3.1                                      | 3.16       | 0.06                | 1.9%                |
| Ribas et al, <sup>8</sup> 2013                | NA       | 0.27       | NA                  | NA                  | 35.8                                       | 35.8       | 0                   | 0.0%                | 13.7                                     | 13.7       | 0                   | 0.0%                |
| Fehrenbacher et al, <sup>9</sup> 2017         | 0.94     | 0.93       | -0.01               | -1.1%               | 2.7                                        | 2.71       | 0.01                | 0.4%                | 3                                        | 3.22       | 0.22                | 7.3%                |
| Rittmeyer et al, <sup>10</sup> 2017           | 0.95     | 0.95       | 0.00                | -0.2%               | 2.8                                        | 2.68       | -0.12               | -4.3%               | 4                                        | 3.98       | -0.02               | -0.5%               |
| Borghaei et al, <sup>11</sup> 2015            | 0.92     | 0.91       | -0.01               | -1.4%               | 2.3                                        | 2.39       | 0.09                | 3.9%                | 4.2                                      | 4.29       | 0.09                | 2.1%                |
| Brahmer et al, <sup>12</sup> 2015             | 0.62     | 0.61       | -0.01               | -1.1%               | 3.5                                        | 3.58       | 0.08                | 2.3%                | 2.8                                      | 2.87       | 0.07                | 2.5%                |
| Carbone et al, <sup>13</sup> 2017             | 1.15     | 1.17       | 0.02                | 1.6%                | 4.2                                        | 4.3        | 0.1                 | 2.4%                | 5.9                                      | 5.95       | 0.05                | 0.8%                |
| Herbst et al, <sup>14</sup> 2016 <sup>e</sup> | 0.79     | 0.78       | -0.01               | -1.9%               | 4                                          | 4.03       | 0.03                | 0.8%                | 4                                        | 4.07       | 0.07                | 1.8%                |
| Herbst et al, <sup>14</sup> 2016 <sup>f</sup> | 0.88     | 0.87       | -0.01               | -0.6%               | 3.9                                        | 3.87       | -0.03               | -0.8%               | 4                                        | 4.07       | 0.07                | 1.8%                |
| Langer et al, <sup>15</sup> 2016              | 0.53     | 0.53       | 0.00                | 0.6%                | 13                                         | 13         | 0                   | 0.0%                | 8.9                                      | 8.9        | 0                   | 0.0%                |
| Reck et al, <sup>16</sup> 2016                | 0.5      | 0.49       | -0.01               | -2.3%               | 10.3                                       | 10.36      | 0.06                | 0.6%                | 6                                        | 6.08       | 0.08                | 1.3%                |

|                                              |      |      |       |       |      |      |       |       |      |      |       |       |
|----------------------------------------------|------|------|-------|-------|------|------|-------|-------|------|------|-------|-------|
| Lynch et al, <sup>17</sup> 2012 <sup>g</sup> | 0.72 | 0.72 | 0.00  | 0.1%  | 5.68 | 5.71 | 0.03  | 0.5%  | 4.63 | 4.68 | 0.05  | 1.1%  |
| Lynch et al, <sup>17</sup> 2012 <sup>h</sup> | 0.81 | 0.80 | -0.01 | -1.6% | 5.52 | 5.55 | 0.03  | 0.5%  | 4.63 | 4.68 | 0.05  | 1.1%  |
| Kang et al, <sup>18</sup> 2017               | 0.6  | 0.62 | 0.02  | 3.8%  | 1.61 | 1.63 | 0.02  | 1.2%  | 1.45 | 1.48 | 0.03  | 2.1%  |
| Ferris et al, <sup>19</sup> 2016             | 0.89 | 0.89 | 0.00  | -0.5% | 2    | 2.07 | 0.07  | 3.5%  | 2.3  | 2.38 | 0.08  | 3.5%  |
| Kwon et al, <sup>20</sup> 2014               | 0.7  | 0.71 | 0.01  | 1.6%  | 4    | 4.01 | 0.01  | 0.2%  | 3.1  | 3.13 | 0.03  | 1.0%  |
| Beer et al, <sup>21</sup> 2016               | 0.67 | 0.68 | 0.01  | 1.4%  | 5.6  | 5.47 | -0.13 | -2.3% | 3.8  | 3.81 | 0.01  | 0.3%  |
| Motzer et al, <sup>22</sup> 2015             | 0.88 | 0.86 | -0.02 | -1.9% | 4.6  | 4.55 | -0.05 | -1.1% | 4.4  | 4.52 | 0.12  | 2.7%  |
| Reck et al, <sup>23</sup> 2013 <sup>i</sup>  | 0.64 | 0.62 | -0.02 | -3.3% | 6.44 | 6.43 | -0.01 | -0.2% | 5.26 | 5.27 | 0.01  | 0.2%  |
| Reck et al, <sup>23</sup> 2013 <sup>j</sup>  | 0.75 | 0.76 | 0.01  | 1.7%  | 5.68 | 5.6  | -0.08 | -1.4% | 5.26 | 5.27 | 0.01  | 0.2%  |
| Reck et al, <sup>24</sup> 2016               | 0.85 | 0.87 | 0.02  | 2.7%  | 4.6  | 4.56 | -0.04 | -0.9% | 4.4  | 4.36 | -0.04 | -0.9% |
| Powels et al, <sup>25</sup> 2018             | 1.01 | 1.00 | -0.01 | -0.9% | 2.4  | 2.23 | -0.17 | -7.1% | 4.2  | 4.39 | 0.19  | 4.5%  |
| Bellmunt et al, <sup>26</sup> 2017           | 0.98 | 0.94 | -0.04 | -4.0% | 2.1  | 2.11 | 0.01  | 0.5%  | 3.3  | 3.24 | -0.06 | -1.8% |

Abbreviations: PFS, progression-free survival; HR, hazard ratio; NR, not reached; NA, not available.

- a. Pembrolizumab q3w vs. ipilimumab.
- b. Pembrolizumab q2w vs. ipilimumab.
- c. Ipilimumab + glycoprotein 100 vs. glycoprotein 100.
- d. Ipilimumab vs. glycoprotein 100.
- e. Pembrolizumab 10mg/kg vs. Docetaxel.
- f. Pembrolizumab 2mg/kg vs. Docetaxel.
- g. Phased ipilimumab + carboplatin + paclitaxel vs. carboplatin + paclitaxel.
- h. Concurrent ipilimumab + carboplatin + paclitaxel vs. carboplatin + paclitaxel.
- i. Phased ipilimumab + carboplatin + paclitaxel vs. carboplatin + paclitaxel.
- j. Concurrent ipilimumab + carboplatin + paclitaxel vs. carboplatin + paclitaxel.

**eTable 4. Sensitivity Analyses in Which A, Only Trials with Primary or Coprimary End Point of Overall Survival Were Included; B, Only Programmed Cell Death 1 or Programmed Cell Death 1 Ligand 1 Inhibitors Trials Were Included; C, Only Phase 3 Trials Were Included; D, Only Non–Small Cell Lung Cancer Trials Were Included; E, Only Melanoma Trials Were Included; F, Only Trials Other Than Non–Small Cell Lung Cancer and Melanoma Were Included; G, Only First-Line Trials Were Included; and H, Only Second-Line or Beyond Trials Were Included**

| Sensitivity analyses                 | R <sup>2</sup> (95% confidence interval) |                  |                  |                  |
|--------------------------------------|------------------------------------------|------------------|------------------|------------------|
|                                      | <b>A</b>                                 | <b>B</b>         | <b>C</b>         | <b>D</b>         |
| OS HR with ratio of 9-month OS rate  | 0.46 (0.15-0.67)                         | 0.54 (0.22-0.80) | 0.50 (0.11-0.72) | 0.54 (0.05-0.92) |
| OS HR with ratio of 12-month OS rate | 0.41 (0.18-0.72)                         | 0.44 (0.05-0.82) | 0.41 (0.17-0.71) | 0.64 (0.12-0.85) |
| OS HR with ratio of 9-month OS RMST  | 0.61 (0.29-0.75)                         | 0.58 (0.23-0.70) | 0.62 (0.24-0.73) | 0.65 (0.01-0.95) |
| OS HR with ratio of 12-month OS RMST | 0.66 (0.41-0.78)                         | 0.66 (0.35-0.80) | 0.67 (0.38-0.79) | 0.68 (0.01-0.94) |
|                                      | R <sup>2</sup> (95% confidence interval) |                  |                  |                  |
|                                      | <b>E</b>                                 | <b>F</b>         | <b>G</b>         | <b>H</b>         |
| OS HR with ratio of 9-month OS rate  | 0.64 (0.20-0.96)                         | 0.60 (0.03-0.86) | 0.70 (0.37-0.98) | 0.49 (0.12-0.69) |
| OS HR with ratio of 12-month OS rate | 0.56 (0.17-0.91)                         | 0.52 (0.01-0.80) | 0.73 (0.48-0.94) | 0.36 (0.00-0.57) |
| OS HR with ratio of 9-month OS RMST  | 0.77 (0.46-0.99)                         | 0.61 (0.00-0.83) | 0.80 (0.60-0.98) | 0.70 (0.20-0.82) |
| OS HR with ratio of 12-month OS RMST | 0.82 (0.56-0.99)                         | 0.67 (0.00-0.88) | 0.87 (0.66-0.99) | 0.69 (0.37-0.83) |

Abbreviations: HR, hazard ratio; RMST, restricted mean survival time.

**eFigure. Kaplan-Meier Survival Estimates.**

**A**

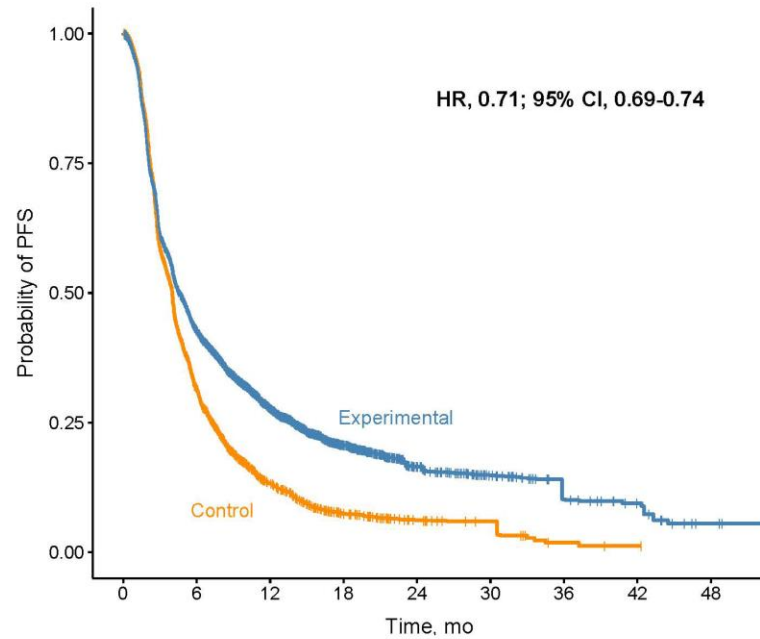

No. at risk

|              |      |      |      |     |     |     |     |    |   |
|--------------|------|------|------|-----|-----|-----|-----|----|---|
| Control      | 5541 | 1491 | 519  | 225 | 153 | 131 | 3   | 1  | 0 |
| Experimental | 7351 | 2879 | 1446 | 688 | 369 | 255 | 161 | 18 | 4 |

**B**

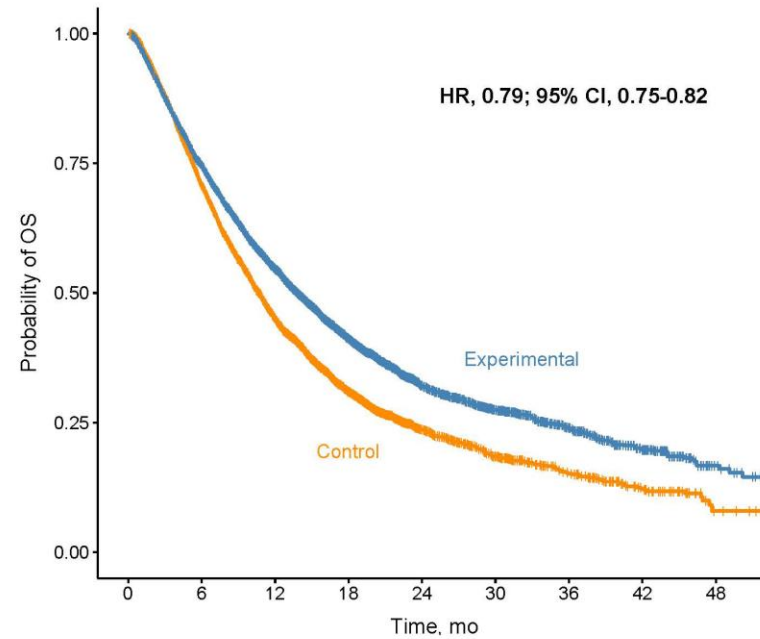

No. at risk

|              |      |      |      |      |     |     |     |     |    |
|--------------|------|------|------|------|-----|-----|-----|-----|----|
| Control      | 5541 | 3691 | 1998 | 931  | 426 | 213 | 123 | 56  | 6  |
| Experimental | 7351 | 5252 | 3244 | 1559 | 757 | 436 | 238 | 117 | 27 |

Progression free survival (A) and overall survival (B) were compared between experimental and control groups by pooling of the total 12892 patients. HR, hazard ratio; |, censored.



## eReferences

1. Robert C, Long GV, Brady B, et al. Nivolumab in previously untreated melanoma without BRAF mutation. *N Engl J Med*. 2015;372(4):320-330.
2. Hodi FS, Chesney J, Pavlick AC, et al. Combined nivolumab and ipilimumab versus ipilimumab alone in patients with advanced melanoma: 2-year overall survival outcomes in a multicentre, randomised, controlled, phase 2 trial. *Lancet Oncol*. 2016;17(11):1558-1568.
3. Larkin J, Minor D, D'Angelo S, et al. Overall Survival in Patients With Advanced Melanoma Who Received Nivolumab Versus Investigator's Choice Chemotherapy in CheckMate 037: A Randomized, Controlled, Open-Label Phase III Trial. *J Clin Oncol*. 2018;36(4):383-390.
4. Robert C, Schachter J, Long GV, et al. Pembrolizumab versus Ipilimumab in Advanced Melanoma. *N Engl J Med*. 2015;372(26):2521-2532.
5. Hodi FS, O'Day SJ, McDermott DF, et al. Improved survival with ipilimumab in patients with metastatic melanoma. *N Engl J Med*. 2010;363(8):711-723.
6. Robert C, Thomas L, Bondarenko I, et al. Ipilimumab plus dacarbazine for previously untreated metastatic melanoma. *N Engl J Med*. 2011;364(26):2517-2526.
7. Hodi FS, Lee S, McDermott DF, et al. Ipilimumab plus sargramostim vs ipilimumab alone for treatment of metastatic melanoma: a randomized clinical trial. *JAMA*. 2014;312(17):1744-1753.
8. Ribas A, Kefford R, Marshall MA, et al. Phase III randomized clinical trial comparing tremelimumab with standard-of-care chemotherapy in patients with advanced melanoma. *J Clin Oncol*. 2013;31(5):616-622.
9. Fehrenbacher L, Spira A, Ballinger M, et al. Atezolizumab versus docetaxel for patients with previously treated non-small-cell lung cancer (POPLAR): a multicentre, open-label, phase 2 randomised controlled trial. *Lancet*. 2016;387(10030):1837-1846.
10. Rittmeyer A, Barlesi F, Waterkamp D, et al. Atezolizumab versus docetaxel in patients with previously treated non-small-cell lung cancer (OAK): a phase 3, open-label, multicentre randomised controlled trial. *Lancet*. 2017;389(10066):255-265.
11. Borghaei H, Paz-Ares L, Horn L, et al. Nivolumab versus Docetaxel in Advanced Nonsquamous Non-Small-Cell Lung Cancer. *N Engl J Med*. 2015;373(17):1627-1639.
12. Brahmer J, Reckamp KL, Baas P, et al. Nivolumab versus Docetaxel in Advanced Squamous-Cell Non-Small-Cell Lung Cancer. *N Engl J Med*. 2015;373(2):123-135.
13. Carbone DP, Reck M, Paz-Ares L, et al. First-Line Nivolumab in Stage IV or Recurrent Non-Small-Cell Lung Cancer. *N Engl J Med*. 2017;376(25):2415-2426.
14. Herbst RS, Baas P, Kim DW, et al. Pembrolizumab versus docetaxel for previously treated, PD-L1-positive, advanced non-small-cell lung cancer (KEYNOTE-010): a randomised controlled trial. *Lancet*. 2016;387(10027):1540-1550.
15. Langer CJ, Gadgeel SM, Borghaei H, et al. Carboplatin and pemetrexed with or without pembrolizumab for advanced, non-squamous non-small-cell lung cancer: a

randomised, phase 2 cohort of the open-label KEYNOTE-021 study. *Lancet Oncol.* 2016;17(11):1497-1508.

16. Reck M, Rodriguez-Abreu D, Robinson AG, et al. Pembrolizumab versus Chemotherapy for PD-L1-Positive Non-Small-Cell Lung Cancer. *N Engl J Med.* 2016;375(19):1823-1833.
17. Lynch TJ, Bondarenko I, Luft A, et al. Ipilimumab in combination with paclitaxel and carboplatin as first-line treatment in stage IIIB/IV non-small-cell lung cancer: results from a randomized, double-blind, multicenter phase II study. *J Clin Oncol.* 2012;30(17):2046-2054.
18. Kang YK, Boku N, Satoh T, et al. Nivolumab in patients with advanced gastric or gastro-oesophageal junction cancer refractory to, or intolerant of, at least two previous chemotherapy regimens (ONO-4538-12, ATTRACTION-2): a randomised, double-blind, placebo-controlled, phase 3 trial. *Lancet.* 2017;390(10111):2461-2471.
19. Ferris RL, Blumenschein G, Jr., Fayette J, et al. Nivolumab for Recurrent Squamous-Cell Carcinoma of the Head and Neck. *N Engl J Med.* 2016;375(19):1856-1867.
20. Kwon ED, Drake CG, Scher HI, et al. Ipilimumab versus placebo after radiotherapy in patients with metastatic castration-resistant prostate cancer that had progressed after docetaxel chemotherapy (CA184-043): a multicentre, randomised, double-blind, phase 3 trial. *Lancet Oncol.* 2014;15(7):700-712.
21. Beer TM, Kwon ED, Drake CG, et al. Randomized, Double-Blind, Phase III Trial of Ipilimumab Versus Placebo in Asymptomatic or Minimally Symptomatic Patients With Metastatic Chemotherapy-Naive Castration-Resistant Prostate Cancer. *J Clin Oncol.* 2017;35(1):40-47.
22. Motzer RJ, Escudier B, McDermott DF, et al. Nivolumab versus Everolimus in Advanced Renal-Cell Carcinoma. *N Engl J Med.* 2015;373(19):1803-1813.
23. Reck M, Bondarenko I, Luft A, et al. Ipilimumab in combination with paclitaxel and carboplatin as first-line therapy in extensive-disease-small-cell lung cancer: results from a randomized, double-blind, multicenter phase 2 trial. *Ann Oncol.* 2013;24(1):75-83.
24. Reck M, Luft A, Szczesna A, et al. Phase III Randomized Trial of Ipilimumab Plus Etoposide and Platinum Versus Placebo Plus Etoposide and Platinum in Extensive-Stage Small-Cell Lung Cancer. *J Clin Oncol.* 2016;34(31):3740-3748.
25. Powles T, Duran I, van der Heijden MS, et al. Atezolizumab versus chemotherapy in patients with platinum-treated locally advanced or metastatic urothelial carcinoma (IMvigor211): a multicentre, open-label, phase 3 randomised controlled trial. *Lancet.* 2018;391(10122):748-757.
26. Bellmunt J, de Wit R, Vaughn DJ, et al. Pembrolizumab as Second-Line Therapy for Advanced Urothelial Carcinoma. *N Engl J Med.* 2017;376(11):1015-1026.
